# Supplementary material for: Minimal mRNA uptake and inflammatory response to COVID-19 mRNA vaccine exposure in human placental explants
Source: PubMed Central journal article supplement — iScience. 2023 Aug 7;26(9):107549. doi: 10.1016/j.isci.2023.107549 (PMC10470080; doi:10.1016/j.isci.2023.107549), 2023-08-07
Supplement: mmc1.pdf [file mmc1.pdf]

iScience, Volume 26

## **Supplemental information**

### **Minimal mRNA uptake and inflammatory response to COVID-19 mRNA vaccine exposure in human placental explants**

**Veronica J. Gonzalez, Lin Li, Sirirak Buarpung, Mary Prah, Joshua F. Robinson, and Stephanie L. Gaw**

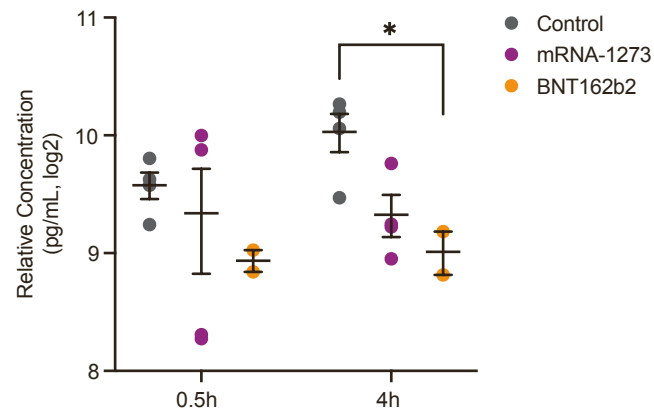

**Figure S1. Expression of IL-23 in conditioned media of human placental explants incubated with COVID mRNA vaccines, Related to Figure 3.** The expression of IL-23 was decreased in explants exposed to the BNT162b2 at 4h compared to the control group. Black bars represent mean with SEM. \* $P < 0.05$  by Kruskal-Wallis test with Dunn's multiple comparisons.
